# Supplementary material for: GluA4 facilitates cerebellar expansion coding and enables associative memory formation
Source: eLife. 2021 Jul 5;10:e65152. doi: 10.7554/eLife.65152 (PMC8291978; doi:10.7554/eLife.65152)
Supplement: Figure 1—source data 1. [file elife-65152-fig1-data1.xlsx]

## Sheet: Sheet1
Kita et al. 2021, doi:
Figure 1–source data
Experiment		MF-GC					MF-GoC					PF-GoC					PF-PC
Measurement		EPSC amplitude		EPSC decay time constant			EPSC amplitude		EPSC decay time constant			EPSC amplitude		EPSC decay time constant			EPSC input-output slope		EPSC decay time constant
Unit		pA	pA	ms	ms		pA	pA	ms	ms		pA	pA	ms	ms		pA/V	pA/V	ms	ms
Genotype		WT	GluA4-KO	WT	GluA4-KO		WT	GluA4-KO	WT	GluA4-KO		WT	GluA4-KO	WT	GluA4-KO		WT	GluA4-KO	WT	GluA4-KO
		32.6465	10.3237	1.7383	1.0791		121.43	69.2684	1.84635	1.27014		53.5694	86.9881	2.13708	1.92798		6.7186	9.1488	16.341	12.6569
		40.5006	8.58393	1.5497	1.2738		70.7052	87.2872	1.2986	2.02835		30.8064	32.6704	3.36188	2.35128		9.4338	15.761	13.071	7.66653
		31.3813	20.7785	2.7646	3.9207		72.382	60.2191	1.95425	1.69236		43.8656	57.8225	1.3665	2.81268		9.5871	8.9204	9.2459	29.711
		118.829	13.1663	1.0356	4.6308		74.8106	71.0358	0.591811	1.87401		79.3203	83.3844	1.59752	1.50321		7.9226	11.32	14.256	8.21819
		82.1274	14.2294	1.9248	2.6192		48.4278	140.66	3.03459	1.43416		76.5809	108.292	2.80239	2.02327		14.889	10.605	1.6387	4.50556
		104.409	10.7662	1.8576	3.3614		51.0226	87.2622	0.710262	1.76411		67.4626	46.6329	3.66746	1.33797		10.934	22.387	11.5473	15.3083
		34.9266	13.3194	1.8555	2.0585		64.6404	55.9267	1.93102	1.62202			29.0342		1.72448		17.424	11.226	15.698	4.0566
		68.0743	10.8293	1.6974	2.221		31.3494	103.186	1.00643	1.77514							12.355	5.4127	4.01981	5.7152
		46.5597	9.95074	1.4974	3.2275		83.585		0.756134								7.2141	6.8316	2.0439	10.42
		100.934	7.2327	2.41288	2.6969		86.7334		1.3472									10.847		4.55934
		65.9947	11.2092	1.02586	4.461		85.9601		1.4361
		55.0547	23.9064	1.40449	2.10094
		76.1692	9.17168	1.79367	7.93662
		174.823	23.7758	1.1587	1.27901
		85.1015	24.3519	2.01017	1.19763
		110.535	12.1883	1.14304	1.56186
		36.4231	13.6192	1.10272	3.89965
		114.021	12.2337	1.98308	2.9934
		36.8299	7.26116	1.91524	6.1075
		59.2151	11.2379	5.56184	2.84167
		209.798	6.55402	1.07707	8.8459
		37.212	9.46952	1.05555	3.426
		22.3875	12.9092	3.83641	1.34764
		71.1385	7.4721	2.63369	4.33027
		60.4905	8.83671	1.2436	4.21934
		54.5948	6.75839	1.15903	1.2054
		69.0054	14.825	2.83276	1.24615
		83.379	7.35421	1.40871	2.3522
		65.2456	10.0541	0.840983	1.03237
		119.792	34.8558	1.83332	2.99768
		94.344	24.0704	0.819399	1.72577
			12.2429		1.21356
			25.1243		1.72402
			7.71021		5.6051
			25.1775		2.7564
			8.35696		5.8824
			7.48881		2.75729
			15.7331		1.9437
			8.93222		3.196
			14.3874		4.30751
