# Supplementary material for: GluA4 facilitates cerebellar expansion coding and enables associative memory formation
Source: eLife. 2021 Jul 5;10:e65152. doi: 10.7554/eLife.65152 (PMC8291978; doi:10.7554/eLife.65152)
Supplement: Figure 2—source data 1. [file elife-65152-fig2-data1.xlsx]

## Sheet: Sheet1
Kita et al. 2021, doi:
Figure 2–source data
Experiment		GC excitability CONTROL					GC excitability BICUCULLINE					GC tonic inhibition
Measurement		Gain		Rheobase current			Gain		Rheobase current			RMS noise		Tonic conductance
Unit		Hz/pA	Hz/pA	pA	pA		Hz/pA	Hz/pA	pA	pA		pA	pA	pS/pF	pS/pF
Genotype		WT	GluA4-KO	WT	GluA4-KO		WT	GluA4-KO	WT	GluA4-KO		WT	GluA4-KO	WT	GluA4-KO
		10.249	2.4989	35	35		6.2526	3.7639	30	10		7.24664	6.36799	106.799	79.2626
		5.126	7.8238	35	10		4.1073	11.604	65	15		4.64081	4.73398	86.1543	46.145
		5.658	7.9761	35	10		4.936	2.0275	15	35		8.01799	3.72217	141.205	25.4088
		5.7359	8.4634	35	15		1.8303	7.3198	45	15		5.99458	5.15865	106.461	26.2631
		6.8109	9.1701	25	20		4.4506	4.6461	35	25		5.30475	3.22905	81.6585	17.981
		4.2454	3.9332	40	40		4.9147	7.2418	15	15		7.68773	3.91143	79.4699	65.5975
		6.7035	4.1911	40	35		4.6827	7.2517	15	25		4.87261	3.85242	34.6665	12.6773
		0.73659	7.3746	30	35		5.8101	7.0612	30	25		3.70891		27.899
		5.5191	4.1984	10	50		6.1064	8.7607	25	30
		3.1553	6.7686	15	30		7.7017	7.8269	30	25
		0.8334	5.0534	45	30		6.0348	7.7045	30	15
		2.9217	3.5974	45	50		4.2462	1.6102	35	20
		2.8	11.161	40	50		4.0982	6.947	30	10
		3.9116	5.0294	35	20		5.7207	3.711	25	30
		4.0766	3.493	35	25		6.4391	4.0259	10	35
		4.127	8.0343	15	15		5.1006	5.0579	40	25
		1.1953	3.251	35	75		5.7842	10.214	30	35
		2.8295	9.1479	15	10		3.9454	5.3107	30	25
		1.88	6.2993	50	10		3.2235	6.8121	25	35
		2.3096	5.3106	35	10		5.1144	5.4275	25	10
		6.2415	5.8706	25	30		4.4695	6.6052	15	25
		3.481	7.2494	60	30		5.7564	9.6572	30	15
		3.4249	7.5512	40	15		3.7789	5.208	20	20
		1.0933	7.0031	80	25		3.8566	8.1746	30	10
		5.7927	1.9084	20	50		15.486	6.3566	20	15
		2.6455	4.5891	25	40		15.07	2.6934	35	35
		1.8384	4.1554	25	30		15.332	1.9767	10	35
		5.054	4.8107	30	40		5.8805	4.0949	30	20
		3.9309	7.2074	60	20		4.3059	7.357	40	50
		7.6846	4.4378	30	25		10.461	3.1469	20	45
		5.712	6.7576	40	15			6.2567		25
		4.1848	4.1451	25	15			5.4356		15
		5.6544	5.0638	20	25			17.286		40
		3.8697	5.161	45	20			3.7062		10
		3.0814	6.9624	75	35			4.1372		25
		9.3511	7.8177	30	10			6.5085		45
		2.0023	8.6449	85	5			4.3274		25
			6.4154		45
			6.8306		15
			8.0315		25
			9.9657		50
			3.7011		25
			3.278		30
			5.783		30
			5.9195		15
			6.5744		15
