# Supplementary material for: GluA4 facilitates cerebellar expansion coding and enables associative memory formation
Source: eLife. 2021 Jul 5;10:e65152. doi: 10.7554/eLife.65152 (PMC8291978; doi:10.7554/eLife.65152)
Supplement: Figure 3—source data 1. [file elife-65152-fig3-data1.xlsx]

## Sheet: Sheet1
Kita et al. 2021, doi:
Figure 3–source data
Experiment		MF-GC EPSC and EPSP					MF-GC amplitude control vs.bicuculline					MF-GC EPSP train 100Hz					MF-GC EPSP train 200Hz					MF-GC EPSP train 300Hz
Measurement		EPSC amplitude		EPSP amplitude			EPSP ctrl		EPSP bic			EPSP_10 control		EPSP_10 bicuculline			EPSP_10 control		EPSP_10 bicuculline			EPSP_10 control		EPSP_10 bicuculline
Unit		pA	pA	mV	mV		mV	mV	mV	mV		mV	mV	mV	mV		mV	mV	mV	mV		mV	mV	mV	mV
Genotype		WT	GluA4-KO	WT	GluA4-KO		WT	GluA4-KO	WT	GluA4-KO		WT	GluA4-KO	WT	GluA4-KO		WT	GluA4-KO	WT	GluA4-KO		WT	GluA4-KO	WT	GluA4-KO
		54.8548	24.8501	11.301	9.3893		11.301	9.3893	16.5518	4.49918		15.5777	15.5542	23.7909	11.3549		14.8617	18.5842	25.9735	8.10385		10.7555	27.8298	27.6761	7.94087
		50.4107	14.053	12.411	6.3636		12.411	6.3636	14.4653	4.60843		8.60851	9.8257	17.3869	9.25166		11.0904	19.4305	24.2862	11.3068		25.2205	34.4901	20.4546	14.5052
		62.584	11.6223	20.785	4.1289		20.785	4.1289	16.4717	7.63745		17.7396	15.627	24.0706	3.45177		20.3031	23.9654	25.5567	14.3544		24.0989	17.8507	29.1868	17.7313
		36.4291	16.6703	24.001	3.8948		24.001	3.8948	25.1585	4.65393		24.1752	12.3296	35.2709	2.64172		23.3813	20.3136	28.1762	11.3137		22.8999	17.8418	29.4452	14.2871
		81.4839	26.4809	7.4051	5.2064		7.4051	5.2064	15.1445	5.70425		25.8232	8.10085	27.1023	3.1597		30.3099	17.6107	22.129	12.4794		9.92574	18.6641	45.1668	17.1903
		74.0739	12.5144	10.009	6.0398		10.009	6.0398	27.7459	2.56483		17.7859	8.9052	32.3889	6.41567		24.474	9.30297	31.2096	12.7673		13.8916	13.285	27.4431	12.0216
		41.8349	31.0362	13.378	2.787		13.378	2.787	17.9109	5.84808		10.7939	7.26064	36.2682	7.57426		11.3888	11.2187	39.7491	6.96552		16.5555	24.1815		5.93684
		121.107	21.9209	18.065	4.0598		18.065	4.0598	12.793	2.47082		7.85534	7.27734		10.1361		9.3721	14.9489		5.55296		14.1303	19.4265		20.6454
		50.6551	19.6821	14.019	7.8338		14.019	7.8338	33.5786	2.47376		9.56973	10.4007		6.44595		12.6107	9.16048		29.6508		16.4045	9.17895		21.2035
		85.1116	16.241	18.881	8.5453		18.881	8.5453	13.0424	2.11322		15.1369	6.41857		9.60949		13.5331	21.3019				21.5695	16.5638
		103.545	23.4338	18.835	5.7767		18.835	5.7767	17.1719	3.05021		18.0174	11.0332		13.2434		14.2899	17.1314				14.3913	12.7215
		203.553	15.6763	7.9314	3.7799		7.9314	3.7799	26.1153	10.0298		11.9679	11.6184		3.99925		16.8104	11.1255				27.3216	6.99689
		99.2269	16.0046	19.544	4.0143		19.544	4.0143	26.7904	1.90776		19.8089	11.0947		12.1084		20.02	6.87111				24.3132	23.2904
		88.4326	12.6586	18.451	4.0494		18.451	4.0494	21.8931	10.3681		17.3145	4.58791		18.8682		17.6285	19.2017				20.7114	11.5092
		63.1524	19.638	16.732	9.0541		16.732	9.0541	19.108	9.78014		11.4371	14.7662				14.2991	11.8763				28.8479	9.47781
		66.8271	17.6734	7.8091	4.5075		7.8091	4.5075	33.0524	8.61676		12.9595	9.92359				18.952	11.5211				23.001	28.9611
		140.118	13.4488	7.85	5.4206		7.85	5.4206	9.06545	1.69285		16.7028	11.5182				21.9207	26.155				14.8911	15.0263
		60.9396	18.3912	17.046	3.8121		17.046	3.8121	22.5239	1.53753		18.2538	18.8057				17.9443	12.0314				19.9594	9.83268
		74.6071	14.2162	20.28	2.8509		20.28	2.8509	35.6125	2.75025		12.2815	9.63496				28.289	12.188				27.456	18.1486
		176.877	21.3323	34.084	4.3685		34.084	4.3685	14.3281	1.28275		21.8377	14.8944				26.3435	16.0185					7.42132
		32.8404	21.653	12.2	3.2994		12.2	3.2994	21.2378	1.32626		24.8931	14.0801				16.81	6.91573					16.9529
		55.4804	13.4452	16.054	4.2517		16.054	4.2517	14.9573	3.09642		17.8128	4.39225				32.0098	20.4324					10.0548
		93.4699	17.0904	23.788	2.7777		23.788	2.7777	22.5647	10.8782		24.838	9.04143				14.2842	9.89558					14.1298
		115.316	19.8871	14.117	4.4723		14.117	4.4723	26.8108	2.5371		11.856	5.9497				12.7076	14.0341					14.859
			12.3461	10.957	9.3833		10.957	9.3833		1.49793		10.4375	8.94719				20.0059	11.4405					12.5587
			19.0484	9.8067	7.8068		9.8067	7.8068		5.34471		16.9541	13.4758				23.8159	10.163					14.114
			12.7426	17.497	5.0623		17.497	5.0623				23.8597	11.4764					11.3415					29.1295
			16.3963	32.201	11.027		32.201	11.027					8.34012					17.1542					10.0187
			9.19314	18.709	9.5165		18.709	9.5165					9.06937					10.0846					19.8674
			14.2174	17.366	11.285		17.366	11.285					12.235					21.197					28.1082
			11.7314	31.76	4.0106		31.76	4.0106					13.1696					25.0178
			9.83538	8.5136	12		8.5136	12					6.84184					23.7989
			11.8526	7.0395	4.4224		7.0395	4.4224					17.7658
			14.7554	19.831	2.6067		19.831	2.6067					15.9749
			10.2366	14.81	2.2314		14.81	2.2314
			11.587		5.269			5.269
			15.1438		3.2689			3.2689
			13.7575		2.1515			2.1515
			11.594		3.3857			3.3857
			12.4966		6.6211			6.6211
			28.7008		3.457			3.457
					3.6656			3.6656
					3.6025			3.6025
					3.7685			3.7685
					3.2869			3.2869
					1.824			1.824
					5.3251			5.3251
					2.9868			2.9868
					3.6555			3.6555
					1.4183			1.4183
					3.7996			3.7996
					4.5724			4.5724
					3.7464			3.7464
