# Supplementary material for: GluA4 facilitates cerebellar expansion coding and enables associative memory formation
Source: eLife. 2021 Jul 5;10:e65152. doi: 10.7554/eLife.65152 (PMC8291978; doi:10.7554/eLife.65152)
Supplement: Figure 4—source data 1. [file elife-65152-fig4-data1.xlsx]

## Sheet: Sheet1
Kita et al. 2021, doi:
Figure 4–source data
Experiment		100 Hz MF stimulation					200 Hz MF stimulation					300 Hz MF stimulation
Measurement		GC firing frequency		First spike delay			GC firing frequency		First spike delay			GC firing frequency		First spike delay
Unit		Hz	Hz	ms	ms		Hz	Hz	ms	ms		Hz	Hz	ms	ms
Genotype		WT	GluA4-KO	WT	GluA4-KO		WT	GluA4-KO	WT	GluA4-KO		WT	GluA4-KO	WT	GluA4-KO
		0	0	1.90321	13.7644		0	0	2.28098	19.4204		0	0	2.58332	23.7828
		0	0	13.0956	74.1583		20	0	3.24968	12.2994		0	0	5.0039	13.6845
		30	0	3.61925	15.1372		100	0	8.51291	15.3305		151.515	0	2.34601	5.37887
		20	0	2.44182	57.4981		120	0	2.01288	12.1049		121.212	0	2.63414	20.9401
		50	0	44.3473	33.5186		80	0	26.7538	29.246		90.9091	0	4.76837	9.04393
		50	40	5.38868	60.623		20	20	2.37864	34.6329		121.212	30.303	1.50537	10.7197
		0	0	1.5327	40.165		40	0	3.8456	29.1573		0	0	2.52849	18.963
		30	10	42.3419			0	0	1.39967			60.6061	30.303	7.14985	19.1197
		0	40	6.65307			60	40	46.0406			0	90.9091	1.88333
		70	0	2.02277			0	0	38.2994			60.6061	0	3.12757
		0	10	2.17205			140	0	3.06714			0	30.303	3.83204
		110	0	2.70331			0	0	2.04772			30.303	0	1.88825
		0	0	1.59669			20	0	2.63742			0	0	13.3708
		0	0	27.3429			0	0	1.63674			0	0	7.77483
		0	0	13.4499			20	40	33.5438			121.212	0
		10	0	1.78975			180	0	8.65236			0	0
		140	30				0	0	6.89587			121.212	90.9091
		0	0				140	80				151.515	90.9091
		110	0				100	40				151.515	0
		90	10				140	0				151.515	30.303
		50	20				20	20				60.6061	90.9091
		110					100	60				90.9091
		20					0					0
		20					20					0
		0
		10
