# Supplementary material for: GluA4 facilitates cerebellar expansion coding and enables associative memory formation
Source: eLife. 2021 Jul 5;10:e65152. doi: 10.7554/eLife.65152 (PMC8291978; doi:10.7554/eLife.65152)
Supplement: Figure 5—source data 1. [file elife-65152-fig5-data1.xlsx]

## Sheet: Sheet1
Kita et al. 2021, doi:
Figure 5–source data
Experiment		NMDAR EPSC			100 Hz EPSC train stimulation
Measurement		EPSC amplitude			AMPAR EPSC charge		NMDAR EPSC charge
Unit		pA	pA		pC	pC	pC	pC
Genotype		WT	GluA4-KO		WT	GluA4-KO	WT	GluA4-KO
		27.7063	38.4668		2.712	0.269365	5.9422	11.1987
		44.8201	25.1938		2.84373	0.623498	5.4384	2.88773
		25.6246	30.2987		2.87568	1.54136	6.19696	3.46853
		27.7678	41.1867		4.97618	1.06895	8.34924	7.34146
		45.2417	48.2887		4.01536	0.850497	4.42706	12.7874
		28.7377	53.6589		4.92689	0.96822	3.59978	9.80791
		21.3556	34.9638		3.44997	0.892451	2.59163	4.38955
		16.4564	34.8053		2.58442	0.534539	4.9812	8.18551
		35.5875	24.4083		3.76624	0.516407	6.37123	3.39015
		33.1489	49.5001		2.45346	0.656199	4.45	7.86673
		23.9921	53.8876		2.54473	1.28631	5.85768	7.96598
		21.6827	31.0028		4.54121	0.994055	5.90881	5.6573
		32.5696	21.6665		5.07838	0.401985	9.12612	12.8804
		20.4105	33.3688		3.54076	0.595925	3.34778	8.17166
		28.879	38.7064		3.0722	1.51084	4.44698	3.3839
		15.8589	24.4097		2.18035	0.56863		7.03309
		17.8852	35.168		4.05247	1.47374		12.9888
			47.7223		2.51996	1.83922		14.5778
			43.7929		5.86193	1.20696		7.0746
			30.3264		3.83559	0.417693		12.3893
			40.784		1.09068	0.336045
					2.58407	0.617586
					4.23512	0.434974
					2.81107	2.00492
						1.4589
						1.08158
						1.11993
						1.23208
						1.46408
						0.392401
						0.785869
